# Supplementary material
Source: publisher site journal article supplement (https://www.spandidos-publications.com/4033/downloadSupplementary)

Figure S1. Expression levels of PDZRN3 in endometrial cancer cells. PDZRN3 expression was identified by reverse transcription quantitative PCR and western blotting. \*P<0.05. PDZRN3, PDZ Domain Containing Ring Finger 3.

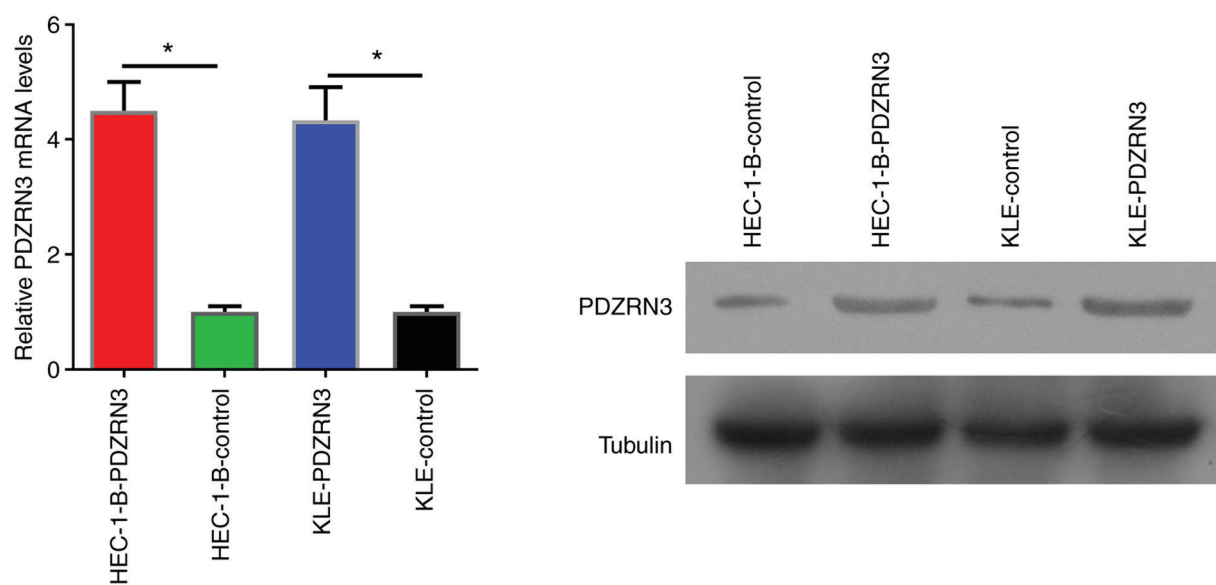

Figure S2. Expression levels of Ki-67 in subcutaneous tumor tissue *in vivo*. Ki-67 staining showed that ki-67 expression was low in PDZRN3-overexpressing groups. Magnification, x400. PDZRN3, PDZ Domain Containing Ring Finger 3.

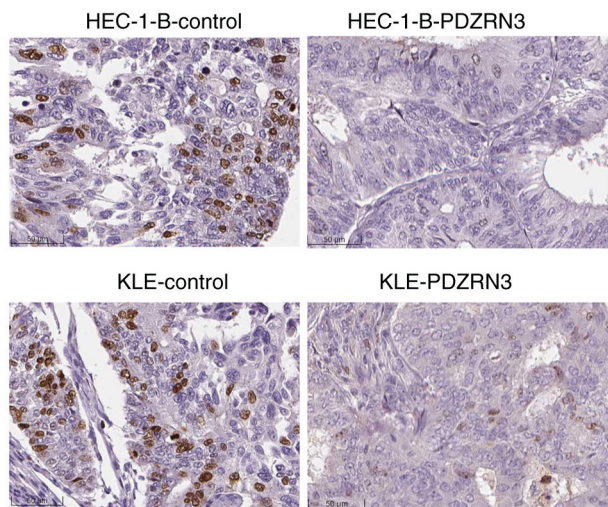

Supplement: Supplementary file 1 [file downloadSupplementary]
